# Supplementary material for: Telomere Dynamics in the Diploid and Triploid Rainbow Trout (Oncorhynchus mykiss) Assessed by Q-FISH Analysis
Source: PubMed Central journal article supplement (PMC7397301; doi:10.3390/genes11070786), 2020-07-13
Supplement: genes-11-00786-s001.pdf [file genes-11-00786-s001.pdf]

| symbol od examined fish | Stage of development | Ploidy | Fluorescence (auf) |
|-------------------------|----------------------|--------|--------------------|
| 1de                     | Embryo               | 2N     | 25,25              |
| 2de                     | Embryo               | 2N     | 29,5               |
| 3de                     | Embryo               | 2N     | 19,25              |
| 4de                     | Embryo               | 2N     | 19,65              |
| 5de                     | Embryo               | 2N     | 27,35              |
| 6de                     | Embryo               | 2N     | 23,2               |
| 7de                     | Embryo               | 2N     | 15,7               |
| 8de                     | Embryo               | 2N     | 39,65              |
| 1te                     | Embryo               | 3N     | 26,8               |
| 2te                     | Embryo               | 3N     | 45,25              |
| 3te                     | Embryo               | 3N     | 21,5               |
| 4te                     | Embryo               | 3N     | 41,6               |
| 5te                     | Embryo               | 3N     | 24,3               |
| 6te                     | Embryo               | 3N     | 39,5               |
| 7te                     | Embryo               | 3N     | 21,5               |
| 8te                     | Embryo               | 3N     | 25,25              |
| 1ld                     | Larva                | 2N     | 25,45              |
| 2ld                     | Larva                | 2N     | 26,4               |
| 3ld                     | Larva                | 2N     | 27,75              |
| 4ld                     | Larva                | 2N     | 26,85              |
| 5ld                     | Larva                | 2N     | 23,25              |
| 6ld                     | Larva                | 2N     | 23,5               |
| 7ld                     | Larva                | 2N     | 33,35              |
| 8ld                     | Larva                | 2N     | 26,35              |
| 1lt                     | Larva                | 3N     | 21,95              |
| 2lt                     | Larva                | 3N     | 21,5               |
| 3lt                     | Larva                | 3N     | 35,25              |
| 4lt                     | Larva                | 3N     | 30,15              |
| 5lt                     | Larva                | 3N     | 24,95              |
| 6lt                     | Larva                | 3N     | 27,9               |
| 7lt                     | Larva                | 3N     | 27,75              |
| 8lt                     | Larva                | 3N     | 45,6               |
| 1dj                     | 1 year old           | 2N     | 32,85              |
| 2dj                     | 1 year old           | 2N     | 13,7               |
| 3dj                     | 1 year old           | 2N     | 26,5               |
| 4dj                     | 1 year old           | 2N     | 15,6               |
| 5dj                     | 1 year old           | 2N     | 20                 |
| 1tj                     | 1 year old           | 3N     | 24,3               |
| 2tj                     | 1 year old           | 3N     | 17,35              |
| 3tj                     | 1 year old           | 3N     | 19,35              |
| 4tj                     | 1 year old           | 3N     | 19,4               |
| 5tj                     | 1 year old           | 3N     | 12,25              |
| 1ds                     | 2 years old          | 2N     | 16,7               |
| 2ds                     | 2 years old          | 2N     | 11,25              |
| 3ds                     | 2 years old          | 2N     | 12,4               |
| 4ds                     | 2 years old          | 2N     | 11,3               |
| 5ds                     | 2 years old          | 2N     | 13,55              |
| 6ds                     | 2 years old          | 2N     | 10,2               |
| 1ts                     | 2 years old          | 3N     | 11,5               |

|     |             |    |       |
|-----|-------------|----|-------|
| 2ts | 2 years old | 3N | 8,4   |
| 3ts | 2 years old | 3N | 10,85 |
| 4ts | 2 years old | 3N | 12,55 |
| 5ts | 2 years old | 3N | 12,75 |
| 6ts | 2 years old | 3N | 12,2  |
| 1da | 3 years old | 2N | 44,1  |
| 2da | 3 years old | 2N | 32,4  |
| 3da | 3 years old | 2N | 69,75 |
| 4da | 3 years old | 2N | 26,1  |
| 5da | 3 years old | 2N | 13,55 |
| 1ta | 3 years old | 3N | 12,65 |
| 2ta | 3 years old | 3N | 25,05 |
| 3ta | 3 years old | 3N | 18,55 |
| 4ta | 3 years old | 3N | 17,85 |
| 5ta | 3 years old | 3N | 16,55 |

| sd   |
|------|
| 6,8  |
| 9,55 |
| 3,2  |
| 5,65 |
| 7,45 |
| 3,2  |
| 1,9  |
| 10,8 |
| 6,7  |
| 11,5 |
| 3,5  |
| 11   |
| 5,85 |
| 9    |
| 4,35 |
| 5,1  |
| 5,1  |
| 5,75 |
| 6,3  |
| 3,7  |
| 3,15 |
| 4,85 |
| 6,1  |
| 4,35 |
| 5,3  |
| 5,6  |
| 7,3  |
| 6,15 |
| 5,4  |
| 6,2  |
| 3,85 |
| 9    |
| 9,25 |
| 2,5  |
| 7,25 |
| 2,15 |
| 4,15 |
| 4,55 |
| 3,1  |
| 2,75 |
| 2,8  |
| 1,75 |
| 2,5  |
| 1,3  |
| 1,4  |
| 1,65 |
| 2,15 |
| 2,3  |
| 3    |

|       |
|-------|
| 0,95  |
| 2,05  |
| 1,55  |
| 2,3   |
| 1,95  |
| 15,35 |
| 6,75  |
| 7,7   |
| 5,1   |
| 1,65  |
| 1,95  |
| 7,5   |
| 4,2   |
| 5,45  |
| 1,65  |
